# Supplementary material for: A Novel Protein from Ectocarpus sp. Improves Salinity and High Temperature Stress Tolerance in Arabidopsis thaliana
Source: MDPI journal article supplement (doi:10.3390/ijms22041971), 2021-02-17

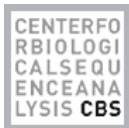

(/)

Bioinformatics (/index.html) >> Prediction Servers (/services/) >> SignalP-5.0 (/services/SignalP-5.0/) >> Results

# SignalP-5.0

## Summary of 1 predicted sequences from Eukarya

Predictions list. Use the help page for more detailed description of the output page.

### Predicted proteins

#### Sequence

Prediction: Other

| Protein type | Signal Peptide (Sec/SPI) | Other  |
|--------------|--------------------------|--------|
| Likelihood   | 0.0167                   | 0.9833 |

**Download:** PNG (/services/SignalP-5.0/tmp/5FDED0D00000654D26D5E92E/output\_Sequence\_plot.png) / EPS (/services/SignalP-5.0/tmp/5FDED0D00000654D26D5E92E/output\_Sequence\_plot.eps) / Tabular (/services/SignalP-5.0/tmp/5FDED0D00000654D26D5E92E/output\_Sequence\_pred.txt)

SignalP-5.0 prediction (Eukarya): Sequence

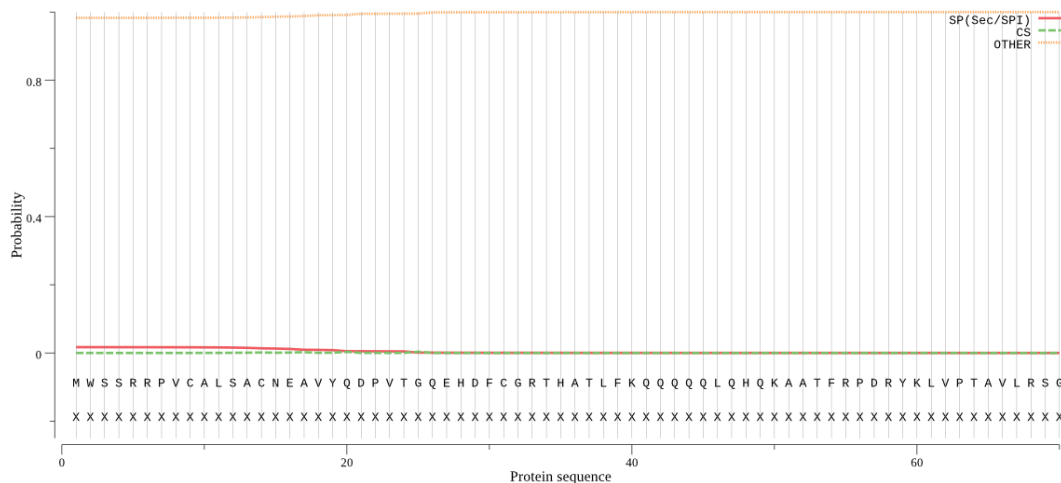

Scientific problems: Henrik Nielsen (mailto:henni@dtu.dk)

Technical problems: Support (mailto:webmaster@cbs.dtu.dk)



(/)

CBS (/index.html) >> CBS Prediction Servers (/services/) >> TargetP-2.0 (/services/TargetP-2.0/) >> Results

# TargetP-2.0

## Summary of 1 predicted sequences from Plant

Predictions list. Use the help page for more detailed description of the output page.

### Predicted proteins

#### Sequence

Prediction: Other

| Protein type | Other  | Signal peptide | Mitochondrial transfer peptide | Chloroplast transfer peptide | Thylakoid luminal transfer peptide |
|--------------|--------|----------------|--------------------------------|------------------------------|------------------------------------|
| Likelihood   | 0.9807 | 0.0017         | 0.0095                         | 0.0058                       | 0.0024                             |

Download: PNG (/services/TargetP-2.0/tmp/5FDED1B400001B3E44C81AD5/output\_Sequence\_plot.png) / EPS (/services/TargetP-2.0/tmp/5FDED1B400001B3E44C81AD5/output\_Sequence\_plot.eps) / Tabular (/services/TargetP-2.0/tmp/5FDED1B400001B3E44C81AD5/output\_Sequence\_pred.txt)

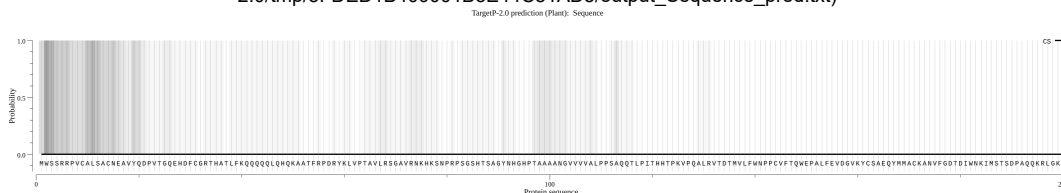

Scientific problems: Henrik Nielsen (mailto:hnielsen@cbs.dtu.dk)

Technical problems: Support (mailto:webmaster@cbs.dtu.dk)

# PSORT: Protein Subcellular Localization Prediction Tool

QUERY (391 aa)

```
MWSSRRPVCA LSACNEAVYQ DPVTGQEHDF CGRTHATLFK QQQQQQLQHOK AATFRPDTRYK
LVPTAVLRSG AVRNRKHSNP RPSGSHTSAG YNHGHPTAAA ANGVVVVALP PSAQQTLPTIT
HHTPKVPQAL RVTDTMVLFW NPPCVFTQWE PALFEVDGVK YCSAEQYMMMA CKANVFGDTD
IWNKIMSTSD PAQQKRLGKE VANYDHGIWN LCKVQFVLTG NYSKFTQNPG MCDQLLATGD
KMLAEASQHD KVGWIGMDAF DPNVERHECW RGQNLLGKIL MYVRNKIRWE RPDLASRRQV
QEAAAAMEAE HRLIPSNGRF VSAAGPAMTA DSLGALNMTA LQTQLHCPDM GLRAPVTAPP
TLGEPAPEVF IAAVAVQQNK ADTDAKTPSK N
```

## Results of Subprograms

PSG: a new signal peptide prediction method

N-region: length 6; pos.chg 2; neg.chg 0  
H-region: length 9; peak value 6.81  
PSG score: 2.41

GvH: von Heijne's method for signal seq. recognition

GvH score (threshold: -2.1): -5.85  
possible cleavage site: between 20 and 21

>>> Seems to have no N-terminal signal peptide

ALOM: Klein et al's method for TM region allocation

Init position for calculation: 1  
Tentative number of TMS(s) for the threshold 0.5: 0  
number of TMS(s) .. fixed  
PERIPHERAL Likelihood = 2.17 (at 97)  
ALOM score: 2.17 (number of TMSs: 0)

MTOP: Prediction of membrane topology (Hartmann et al.)

Center position for calculation: 6  
Charge difference: -6.5 C(-3.5) - N( 3.0)  
N >= C: N-terminal side will be inside

MITDISC: discrimination of mitochondrial targeting seq

|                 |       |                 |       |
|-----------------|-------|-----------------|-------|
| R content:      | 2     | Hyd Moment(75): | 10.51 |
| Hyd Moment(95): | 8.53  | G content:      | 0     |
| D/E content:    | 1     | S/T content:    | 3     |
| Score:          | -1.37 |                 |       |

Gavel: prediction of cleavage sites for mitochondrial preseq

R-2 motif at 16 RRP|VC

NUCDISC: discrimination of nuclear localization signals

pat4: none  
pat7: none  
bipartite: none  
content of basic residues: 10.2%  
NLS Score: -0.47

KDEL: ER retention motif in the C-terminus: none

#### ER Membrane Retention Signals:

XXRR-like motif in the N-terminus: WSSR

KKXX-like motif in the C-terminus: TPSK

SKL: peroxisomal targeting signal in the C-terminus: none

SKL2: 2nd peroxisomal targeting signal: none

VAC: possible vacuolar targeting motif: found  
TLPI at 116

RNA-binding motif: none

#### Actinin-type actin-binding motif:

type 1: none

type 2: none

NMYR: N-myristoylation pattern : none

Prenylation motif: none

memYQRL: transport motif from cell surface to Golgi: none

Tyrosines in the tail: none

Dileucine motif in the tail: none

checking 63 PROSITE DNA binding motifs: none

checking 71 PROSITE ribosomal protein motifs: none

checking 33 PROSITE prokaryotic DNA binding motifs: none

#### NNCN: Reinhardt's method for Cytoplasmic/Nuclear discrimination

Prediction: cytoplasmic

Reliability: 55.5

#### COIL: Lupas's algorithm to detect coiled-coil regions

total: 0 residues

## Results of the *k*-NN Prediction

*k* = 9/23

47.8 %: mitochondrial  
13.0 %: nuclear  
13.0 %: cytoplasmic  
8.7 %: endoplasmic reticulum  
8.7 %: Golgi  
4.3 %: extracellular, including cell wall  
4.3 %: vacuolar

>> prediction for 160843903028872 is mit (k=23)

## iPSORT Prediction

Predicted as: *not having any of signal, mitochondrial targeting, or chloroplast transit peptides*

Sequence (Type: plant)

**1** MWSSR RPVCA LSACN EAVYQ DPVTG QEHD F CGRTH ATLFK QQQQ LQH QK  
**51** AATFR PDRYK LVPTA VLRSG AVRNK HKS NP RPSGS HTSAG YN HGH PTAAA  
**101** ANGVV VVALP PSAQQ TLPIT HHTPK VPQAL RVTDT MVLFW NPPCV FTQWE  
**151** PALFE VDGVK YCSAE QYMM A CKANV FGDTD IWNKI MSTSD PAQQK RL GKE  
**201** VANYD HGIWN LCKVQ FVL TG NYSKF TQ NPG MCDQL LATGD KMLAE ASQHD  
**251** KVMGI GMDAF DPNVE RHECW RGQNL LGKIL MYVRN KIRWE RPD LA SRRQV  
**301** QEAAA AMEAE HRLIP SNGRF VSAAG PAMTA DSLGA LNMTA LQTQL HCPDM  
**351** GLRAP VTAPP TLGEP APEVF IAVAA VQQNK ADTDA KTPSK N

Values used for reasoning

| Node                              | Answer | View                                               | Substring | Value(s)                                                                      | Plot                 |
|-----------------------------------|--------|----------------------------------------------------|-----------|-------------------------------------------------------------------------------|----------------------|
| 1. Signal peptide?                | No     | Average Hydropathy (KYTJ820101)                    | [6,25]    | 0.095 ( >= 0.9225? No)                                                        | <a href="#">show</a> |
| 2. Mitochondrial or chloroplast ? | No     | Average Negative Charge (FAUJ880112)               | [1,30]    | 0.133333 ( < 0.083? No)                                                       | <a href="#">show</a> |
|                                   |        | Indexing: A11<br>Pattern: 22121222 (ins/del <= 2)  | [1,30]    | MWSSR-RPVCALSACNEAVYQDPVTGQEHD F<br>22221-12222222002222022020002<br>22121222 | --                   |
| 3. Mitochondrial?                 | No     | Average Isoelectric Point (ZIMJ680104)             | [1,15]    | 6.396 ( >= 6.21? Yes)                                                         | <a href="#">show</a> |
|                                   |        | Indexing: A12<br>Pattern: 100100110 (ins/del <= 3) | [1,15]    | -MW-SSRR-PVCALSACN<br>-00-0011-200000000<br>100100110                         | --                   |

\* This color means "not used".

| Name | Alphabet Indexing |    |              |
|------|-------------------|----|--------------|
|      | 0                 | 1  | 2            |
| A11  | DEGHKN            | IR | ACFLMPQSTVWY |
| A12  | ACDEFGHLMNQSTVWY  | KR | IP           |

[Return to iPSORT Home](#)

### PSORT features and traditional PSORTII prediction

| id          | site | distance | identity                 | comments                                                               |
|-------------|------|----------|--------------------------|------------------------------------------------------------------------|
| ODPA_SOLTU  | mito | 259.787  | <a href="#">11.75%</a>   | <a href="#">[Uniprot]</a> SWISS-PROT45:Mitochondrial matrix.           |
| GTH_SILCU   | cyto | 273.776  | <a href="#">12.532%</a>  | <a href="#">[Uniprot]</a> SWISS-PROT45:Cytoplasmic.                    |
| GLN2_CHLRE  | chlo | 282.603  | <a href="#">12.4365%</a> | <a href="#">[Uniprot]</a> SWISS-PROT45:Chloroplast.                    |
| At2g30970.1 | mito | 285.134  | <a href="#">12.761%</a>  | <a href="#">[Arath]</a>                                                |
| RBS1_CHLRE  | chlo | 287.271  | <a href="#">12.0205%</a> | <a href="#">[Uniprot]</a> SWISS-PROT45:Chloroplast.                    |
| PODK_MAIZE  | chlo | 291.348  | <a href="#">11.0876%</a> | <a href="#">[Uniprot]</a> SWISS-PROT45:Chloroplast.                    |
| ADH1_PETHY  | cyto | 291.367  | <a href="#">8.39695%</a> | <a href="#">[Uniprot]</a> SWISS-PROT45:Cytoplasmic.                    |
| RBS5_ACEME  | chlo | 294.509  | <a href="#">10.9974%</a> | <a href="#">[Uniprot]</a> SWISS-PROT45:Chloroplast.                    |
| FDH_SOLTU   | mito | 295.108  | <a href="#">11.1959%</a> | <a href="#">[Uniprot]</a> SWISS-PROT45:Mitochondrial.                  |
| ADH3_SOLTU  | cyto | 302.578  | <a href="#">11.2245%</a> | <a href="#">[Uniprot]</a> SWISS-PROT45:Cytoplasmic.                    |
| GLYM_FLAPR  | mito | 303.126  | <a href="#">10.8317%</a> | <a href="#">[Uniprot]</a> SWISS-PROT45:Mitochondrial.                  |
| ADH2_LYCES  | cyto | 304.536  | <a href="#">11.9898%</a> | <a href="#">[Uniprot]</a> SWISS-PROT45:Cytoplasmic.                    |
| RBS3_ACECL  | chlo | 304.855  | <a href="#">10.9974%</a> | <a href="#">[Uniprot]</a> SWISS-PROT45:Chloroplast.                    |
| CB48_MAIZE  | chlo | 307.547  | <a href="#">15.601%</a>  | <a href="#">[Uniprot]</a> SWISS-PROT45:Chloroplast thylakoid membrane. |

| id              | site  | iPSORT   |         |     |     |     |     |     | PSORT Features |     |     |     |     |     |    |     |     |    |    | Amino Acid Content |    |    |    |    |    |        |  |  |  | Misc. |
|-----------------|-------|----------|---------|-----|-----|-----|-----|-----|----------------|-----|-----|-----|-----|-----|----|-----|-----|----|----|--------------------|----|----|----|----|----|--------|--|--|--|-------|
|                 |       | MxHy1_30 | Mx-1_20 | dna | cr1 | mlb | m3a | mNt | mip            | mit | nuc | pox | psg | rib | mp | tms | yqr | A  | C  | Q                  | H  | I  | L  | S  | V  | length |  |  |  |       |
| 160843885328766 | chlo? | 71       | 71      | 47  | 50  | 48  | 47  | 49  | 48             | 78  | 30  | 49  | 38  | 49  | 50 | 39  | 44  | 90 | 85 | 96                 | 92 | 5  | 25 | 8  | 56 | 60     |  |  |  |       |
| ODPA_SOLTU      | mito  | 79       | 71      | 47  | 50  | 48  | 47  | 49  | 64             | 85  | 30  | 49  | 38  | 49  | 50 | 39  | 44  | 86 | 68 | 19                 | 82 | 51 | 25 | 20 | 15 | 60     |  |  |  |       |
| GTH_SILCU       | cyto  | 49       | 71      | 47  | 50  | 48  | 47  | 49  | 55             | 71  | 30  | 49  | 38  | 49  | 50 | 39  | 44  | 75 | 13 | 84                 | 97 | 12 | 95 | 4  | 56 | 26     |  |  |  |       |
| GLN2_CHLRE      | chlo  | 55       | 87      | 47  | 50  | 48  | 47  | 49  | 68             | 84  | 30  | 49  | 38  | 49  | 50 | 39  | 44  | 68 | 70 | 14                 | 78 | 43 | 18 | 9  | 37 | 57     |  |  |  |       |
| At2g30970.1     | mito  | 66       | 87      | 47  | 50  | 48  | 47  | 49  | 66             | 78  | 30  | 49  | 38  | 49  | 50 | 39  | 44  | 58 | 54 | 72                 | 89 | 35 | 48 | 56 | 26 | 65     |  |  |  |       |
| RBS1_CHLRE      | chlo  | 85       | 71      | 47  | 50  | 48  | 47  | 49  | 62             | 83  | 30  | 49  | 38  | 49  | 50 | 39  | 44  | 98 | 78 | 91                 | 1  | 19 | 5  | 21 | 95 | 21     |  |  |  |       |
| PODK_MAIZE      | chlo  | 69       | 87      | 47  | 50  | 48  | 47  | 49  | 49             | 74  | 96  | 49  | 38  | 49  | 50 | 39  | 44  | 79 | 66 | 78                 | 53 | 24 | 61 | 13 | 69 | 94     |  |  |  |       |
| ADH1_PETHY      | cyto  | 62       | 71      | 47  | 50  | 48  | 47  | 49  | 52             | 60  | 30  | 49  | 38  | 49  | 50 | 39  | 44  | 31 | 93 | 33                 | 88 | 54 | 14 | 15 | 92 | 57     |  |  |  |       |
| RBS5_ACEME      | chlo  | 76       | 87      | 47  | 50  | 48  | 47  | 49  | 78             | 69  | 30  | 49  | 38  | 49  | 50 | 39  | 44  | 81 | 92 | 94                 | 6  | 12 | 14 | 32 | 49 | 20     |  |  |  |       |
| FDH_SOLTU       | mito  | 52       | 71      | 47  | 50  | 48  | 47  | 49  | 63             | 88  | 30  | 49  | 38  | 49  | 50 | 39  | 44  | 82 | 49 | 42                 | 88 | 66 | 63 | 4  | 37 | 57     |  |  |  |       |
| ADH3_SOLTU      | cyto  | 67       | 71      | 47  | 50  | 48  | 47  | 49  | 51             | 53  | 30  | 49  | 38  | 49  | 50 | 39  | 44  | 54 | 91 | 10                 | 84 | 61 | 24 | 15 | 96 | 57     |  |  |  |       |
| GLYM_FLAPR      | mito  | 53       | 71      | 47  | 50  | 48  | 47  | 49  | 59             | 69  | 30  | 49  | 38  | 49  | 50 | 39  | 44  | 80 | 11 | 54                 | 75 | 35 | 53 | 33 | 55 | 76     |  |  |  |       |
| ADH2_LYCES      | cyto  | 67       | 71      | 47  | 50  | 48  | 47  | 49  | 51             | 53  | 30  | 49  | 38  | 49  | 50 | 39  | 44  | 58 | 93 | 6                  | 84 | 55 | 32 | 15 | 96 | 57     |  |  |  |       |
| RBS3_ACECL      | chlo  | 64       | 71      | 47  | 50  | 48  | 47  | 49  | 78             | 74  | 30  | 49  | 38  | 49  | 50 | 39  | 44  | 69 | 92 | 94                 | 6  | 20 | 9  | 32 | 37 | 20     |  |  |  |       |
| CB48_MAIZE      | chlo  | 77       | 71      | 47  | 50  | 48  | 47  | 49  | 52             | 56  | 30  | 49  | 38  | 49  | 50 | 39  | 44  | 86 | 42 | 10                 | 53 | 19 | 53 | 12 | 60 | 36     |  |  |  |       |

| id              | site  | iPSORT                   | PSORT Features          |                     |                     |                     |                     |                     |                     |                     |                     |                     |                     |                     |                     |                     |                     |                   | Amino Acid Content |                   |                   |                   |                   |                   |                   |                        |  |  |  |  | Misc. |
|-----------------|-------|--------------------------|-------------------------|---------------------|---------------------|---------------------|---------------------|---------------------|---------------------|---------------------|---------------------|---------------------|---------------------|---------------------|---------------------|---------------------|---------------------|-------------------|--------------------|-------------------|-------------------|-------------------|-------------------|-------------------|-------------------|------------------------|--|--|--|--|-------|
|                 |       | <a href="#">MxHyI_30</a> | <a href="#">Mx-I_20</a> | <a href="#">dna</a> | <a href="#">erl</a> | <a href="#">mlb</a> | <a href="#">m3a</a> | <a href="#">mNr</a> | <a href="#">mip</a> | <a href="#">mit</a> | <a href="#">nuc</a> | <a href="#">pox</a> | <a href="#">psg</a> | <a href="#">rib</a> | <a href="#">rnp</a> | <a href="#">rms</a> | <a href="#">yqr</a> | <a href="#">A</a> | <a href="#">C</a>  | <a href="#">Q</a> | <a href="#">H</a> | <a href="#">I</a> | <a href="#">L</a> | <a href="#">S</a> | <a href="#">V</a> | <a href="#">length</a> |  |  |  |  |       |
|                 |       |                          |                         |                     |                     |                     |                     |                     |                     |                     |                     |                     |                     |                     |                     |                     |                     |                   |                    |                   |                   |                   |                   |                   |                   |                        |  |  |  |  |       |
| 160843885328766 | chlo? | 13.50                    | 2.00                    | 0                   | 0                   | 0                   | 0                   | 0                   | 16                  | -1.37               | -0.47               | 0                   | -4                  | 0                   | 0                   | 0                   | 0                   | 0.118             | 0.026              | 0.069             | 0.036             | 0.023             | 0.069             | 0.049             | 0.074             | 391                    |  |  |  |  |       |
| ODPA_SOLTU      | mito  | 15.30                    | 2.00                    | 0                   | 0                   | 0                   | 0                   | 0                   | 35                  | -0.07               | -0.47               | 0                   | -4                  | 0                   | 0                   | 0                   | 0                   | 0.110             | 0.018              | 0.020             | 0.028             | 0.054             | 0.069             | 0.059             | 0.054             | 391                    |  |  |  |  |       |
| GTH_SILCU       | cyto  | 9.00                     | 2.00                    | 0                   | 0                   | 0                   | 0                   | 0                   | 25                  | -2.61               | -0.47               | 0                   | -4                  | 0                   | 0                   | 0                   | 0                   | 0.097             | 0.005              | 0.046             | 0.051             | 0.032             | 0.120             | 0.042             | 0.074             | 216                    |  |  |  |  |       |
| GLN2_CHLRE      | chlo  | 10.40                    | 3.00                    | 0                   | 0                   | 0                   | 0                   | 0                   | 39                  | -0.30               | -0.47               | 0                   | -4                  | 0                   | 0                   | 0                   | 0                   | 0.092             | 0.018              | 0.018             | 0.026             | 0.050             | 0.063             | 0.050             | 0.066             | 380                    |  |  |  |  |       |
| At2g30970.1     | mito  | 12.40                    | 3.00                    | 0                   | 0                   | 0                   | 0                   | 0                   | 37                  | -1.50               | -0.47               | 0                   | -4                  | 0                   | 0                   | 0                   | 0                   | 0.084             | 0.014              | 0.040             | 0.033             | 0.047             | 0.084             | 0.079             | 0.060             | 430                    |  |  |  |  |       |
| RBS1_CHLRE      | chlo  | 18.00                    | 2.00                    | 0                   | 0                   | 0                   | 0                   | 0                   | 33                  | -0.39               | -0.47               | 0                   | -4                  | 0                   | 0                   | 0                   | 0                   | 0.157             | 0.022              | 0.054             | 0.000             | 0.038             | 0.049             | 0.059             | 0.103             | 185                    |  |  |  |  |       |
| PODK_MAIZE      | chlo  | 13.10                    | 3.00                    | 0                   | 0                   | 0                   | 0                   | 0                   | 17                  | -2.06               | 1.41                | 0                   | -4                  | 0                   | 0                   | 0                   | 0                   | 0.101             | 0.017              | 0.042             | 0.019             | 0.041             | 0.091             | 0.054             | 0.080             | 947                    |  |  |  |  |       |
| ADH1_PETHY      | cyto  | 11.80                    | 2.00                    | 0                   | 0                   | 0                   | 0                   | 0                   | 21                  | -3.66               | -0.47               | 0                   | -4                  | 0                   | 0                   | 0                   | 0                   | 0.068             | 0.034              | 0.026             | 0.031             | 0.055             | 0.060             | 0.055             | 0.097             | 382                    |  |  |  |  |       |
| RBS5_ACEME      | chlo  | 14.70                    | 3.00                    | 0                   | 0                   | 0                   | 0                   | 0                   | 52                  | -2.89               | -0.47               | 0                   | -4                  | 0                   | 0                   | 0                   | 0                   | 0.104             | 0.033              | 0.060             | 0.005             | 0.033             | 0.060             | 0.066             | 0.071             | 183                    |  |  |  |  |       |
| FDH_SOLTU       | mito  | 9.70                     | 2.00                    | 0                   | 0                   | 0                   | 0                   | 0                   | 34                  | 0.63                | -0.47               | 0                   | -4                  | 0                   | 0                   | 0                   | 0                   | 0.105             | 0.013              | 0.029             | 0.031             | 0.060             | 0.092             | 0.042             | 0.066             | 381                    |  |  |  |  |       |
| ADH3_SOLTU      | cyto  | 12.70                    | 2.00                    | 0                   | 0                   | 0                   | 0                   | 0                   | 20                  | -4.24               | -0.47               | 0                   | -4                  | 0                   | 0                   | 0                   | 0                   | 0.082             | 0.032              | 0.016             | 0.029             | 0.058             | 0.068             | 0.055             | 0.105             | 380                    |  |  |  |  |       |
| GLYM_FLAPR      | mito  | 10.00                    | 2.00                    | 0                   | 0                   | 0                   | 0                   | 0                   | 30                  | -2.87               | -0.47               | 0                   | -4                  | 0                   | 0                   | 0                   | 0                   | 0.103             | 0.004              | 0.033             | 0.025             | 0.046             | 0.087             | 0.066             | 0.074             | 517                    |  |  |  |  |       |
| ADH2_LYCES      | cyto  | 12.70                    | 2.00                    | 0                   | 0                   | 0                   | 0                   | 0                   | 20                  | -4.24               | -0.47               | 0                   | -4                  | 0                   | 0                   | 0                   | 0                   | 0.084             | 0.034              | 0.013             | 0.029             | 0.055             | 0.074             | 0.055             | 0.105             | 380                    |  |  |  |  |       |

|            |      |       |      |   |   |   |   |   |    |       |       |   |    |   |   |   |   |       |       |       |       |       |       |       |       |     |
|------------|------|-------|------|---|---|---|---|---|----|-------|-------|---|----|---|---|---|---|-------|-------|-------|-------|-------|-------|-------|-------|-----|
| RBS3_ACECL | chlo | 12.10 | 2.00 | 0 | 0 | 0 | 0 | 0 | 52 | -2.06 | -0.47 | 0 | -4 | 0 | 0 | 0 | 0 | 0.093 | 0.033 | 0.060 | 0.005 | 0.038 | 0.055 | 0.066 | 0.066 | 183 |
| CB48_MAIZE | chlo | 14.90 | 2.00 | 0 | 0 | 0 | 0 | 0 | 21 | -4.05 | -0.47 | 0 | -4 | 0 | 0 | 0 | 0 | 0.110 | 0.011 | 0.015 | 0.019 | 0.038 | 0.087 | 0.053 | 0.076 | 264 |

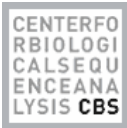

(/)

CBS (/index.html) >> CBS Prediction Servers (/services/) >> DeepLoc-1.0 (/services/DeepLoc-1.0/) >> Results

# DeepLoc-1.0

## Summary of 1 predicted sequences

Table of predicted subcellular localizations. Use the help page for more detailed description of the output page.

### Predicted proteins

#### Sequence

Prediction: Mitochondrion, Soluble

| Localization | Mitochondrion | Cytoplasm | Extracellular | Nucleus | Plastid | Peroxisome | Lysosome/Vacuole | Cell membrane | Endoplasmic reticulum |
|--------------|---------------|-----------|---------------|---------|---------|------------|------------------|---------------|-----------------------|
| Likelihood   | 0.5139        | 0.2099    | 0.145         | 0.0637  | 0.036   | 0.0232     | 0.0027           | 0.0024        | 0.0024                |

| Type       | Soluble | Membrane |
|------------|---------|----------|
| Likelihood | 0.8906  | 0.1094   |

**Hierarchical Tree. Download:** PNG (/services/DeepLoc-1.0/tmp/5FDED13C00000345334C3C54/tree\_1.png) / EPS (/services/DeepLoc-1.0/tmp/5FDED13C00000345334C3C54/tree\_1.eps)



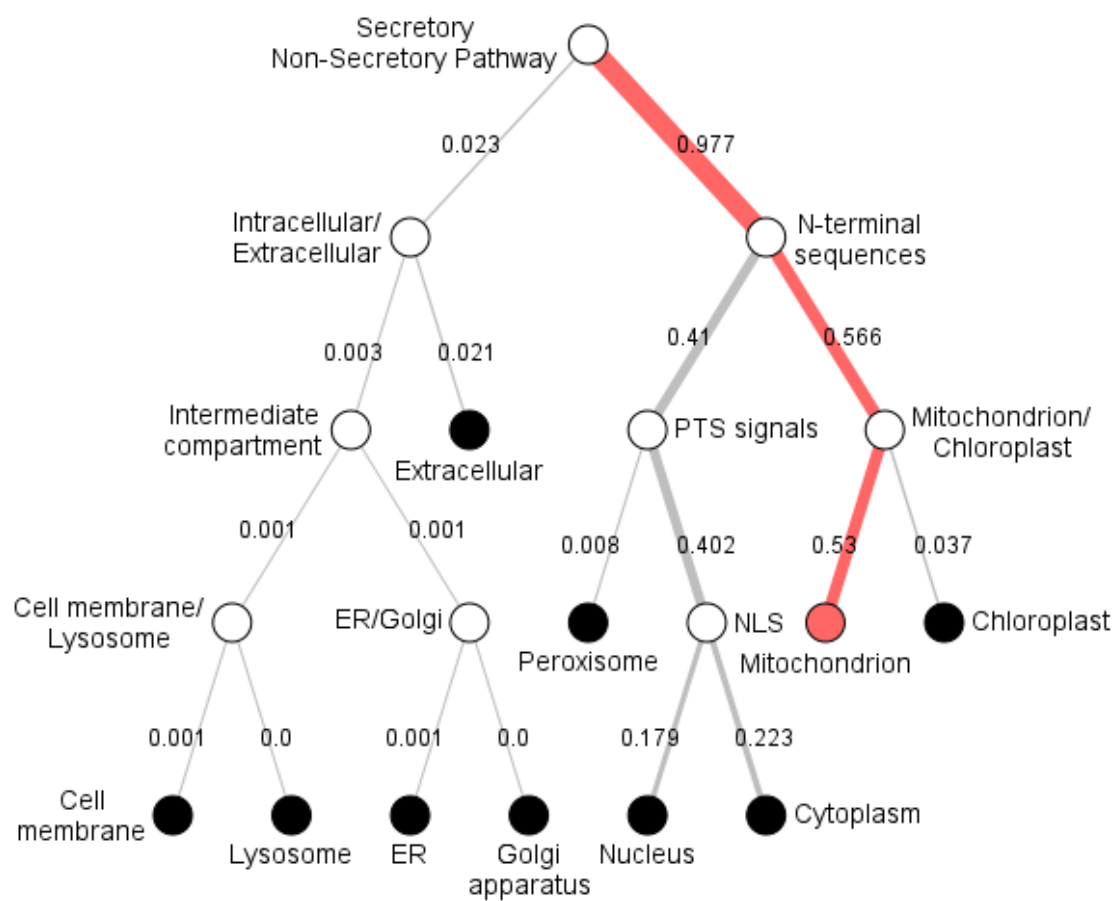

**Position Importance. Download:** PNG (/services/DeepLoc-1.0/tmp/5FDED13C00000345334C3C54/alpha\_1.png) / EPS (/services/DeepLoc-1.0/tmp/5FDED13C00000345334C3C54/alpha\_1.eps) / CSV (/services/DeepLoc-1.0/tmp/5FDED13C00000345334C3C54/alpha\_1.csv)

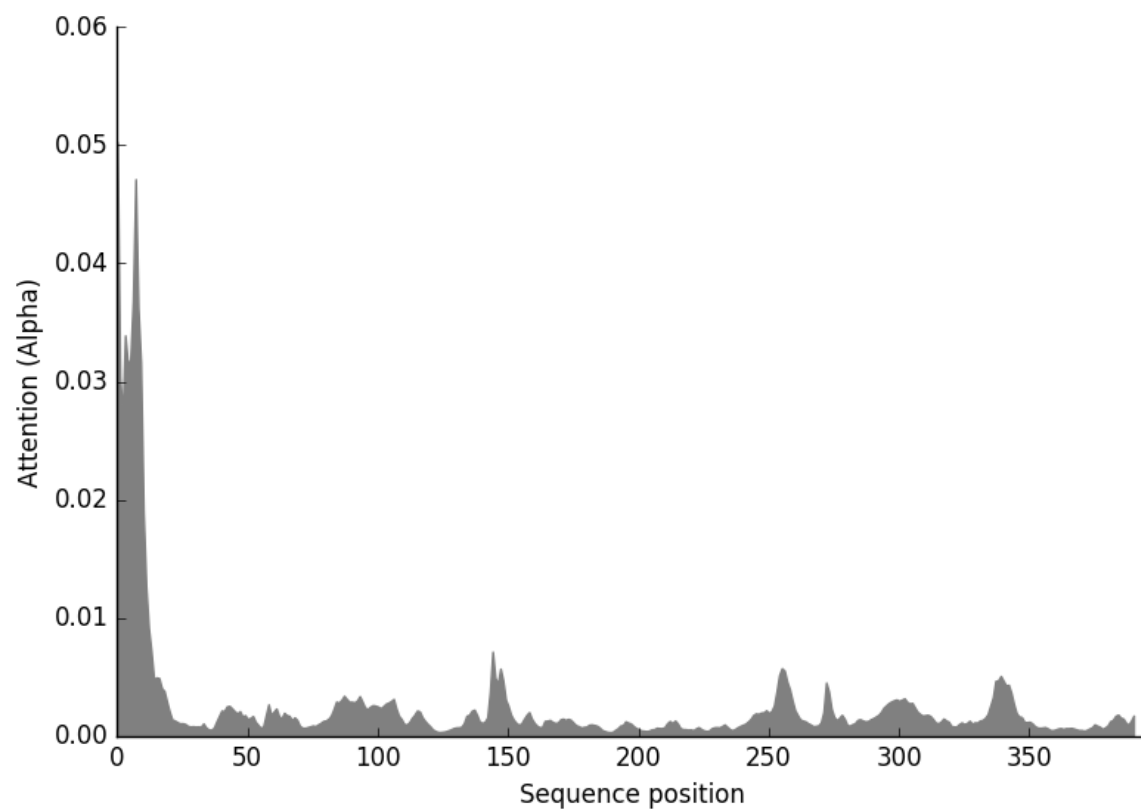

Supplement: s1 [file s1]
